# Supplementary material for: Stabilizing cubic γ-Ga2O3:Cr3+ spinel nanocrystals by size confinement into mesoporous silica nanoreactor channels
Source: Royal Society of Chemistry journal article supplement (doi:10.1039/d4tc01386g), 2024-01-01
Supplement: d4tc01386g1.pdf [file d4tc01386g1.pdf]

## Stabilizing Cubic $\gamma$ -Ga<sub>2</sub>O<sub>3</sub>:Cr<sup>3+</sup> Spinel Nanocrystals by Size Confinement into Mesoporous Silica Nanoreactor Channels

Michele Crozzolin,<sup>1</sup> Camilla Belloni,<sup>1</sup> Jian Xu,<sup>2,3</sup> Takayuki Nakanishi,<sup>4</sup> Jumpei Ueda,<sup>5</sup> Setsuhisa Tanabe,<sup>3</sup> Federico Dallo,<sup>6</sup> Eleonora Balliana,<sup>7</sup> Asia Saorin,<sup>1</sup> Flavio Rizzolio,<sup>1,8</sup> Davide Cristofori,<sup>1</sup> Pietro Riello,<sup>1</sup> Alvise Benedetti,<sup>1</sup> Michele Back,<sup>1,\*</sup>

<sup>1</sup> Department of Molecular Sciences and Nanosystems, Ca' Foscari University of Venice, Via Torino 155, 30172, Mestre – Venezia, Italy

<sup>2</sup> International Center for Young Scientists (ICYS), National Institute of Materials Science (NIMS), Tsukuba, Ibaraki 305-0044, Japan

<sup>3</sup> Graduate School of Global Environmental Studies, Kyoto University, Yoshida nihonmatsu-cho, Sakyo-ku, Kyoto 606-8501, Japan

<sup>4</sup> Advanced Phosphor Group, National Institute of Materials Science (NIMS), Tsukuba, Ibaraki 305-0044, Japan

<sup>5</sup> Graduate School of Advanced Science and Technology, Japan Advanced Institute of Science and Technology (JAIST), 1-1 Asahidai, Nomi, Ishikawa, 923-1292 Japan

<sup>6</sup> Institute of Polar Sciences - National Research Council (ISP-CNR), Via Torino 155, 30172, Venezia-Mestre, Venice, Italy

<sup>7</sup> Department of Environmental Sciences, Informatics, Statistics, Ca' Foscari University of Venice, Scientific Campus - Via Torino 155, 30170 Venezia Mestre, Italy

<sup>8</sup> Pathology Unit, Department of Molecular Biology and Translational Research, Centro di Riferimento Oncologico di Aviano (CRO) IRCCS, via Franco Gallini 2, 33081 Aviano, Italy

\* corresponding author email: michele.back@unive.it

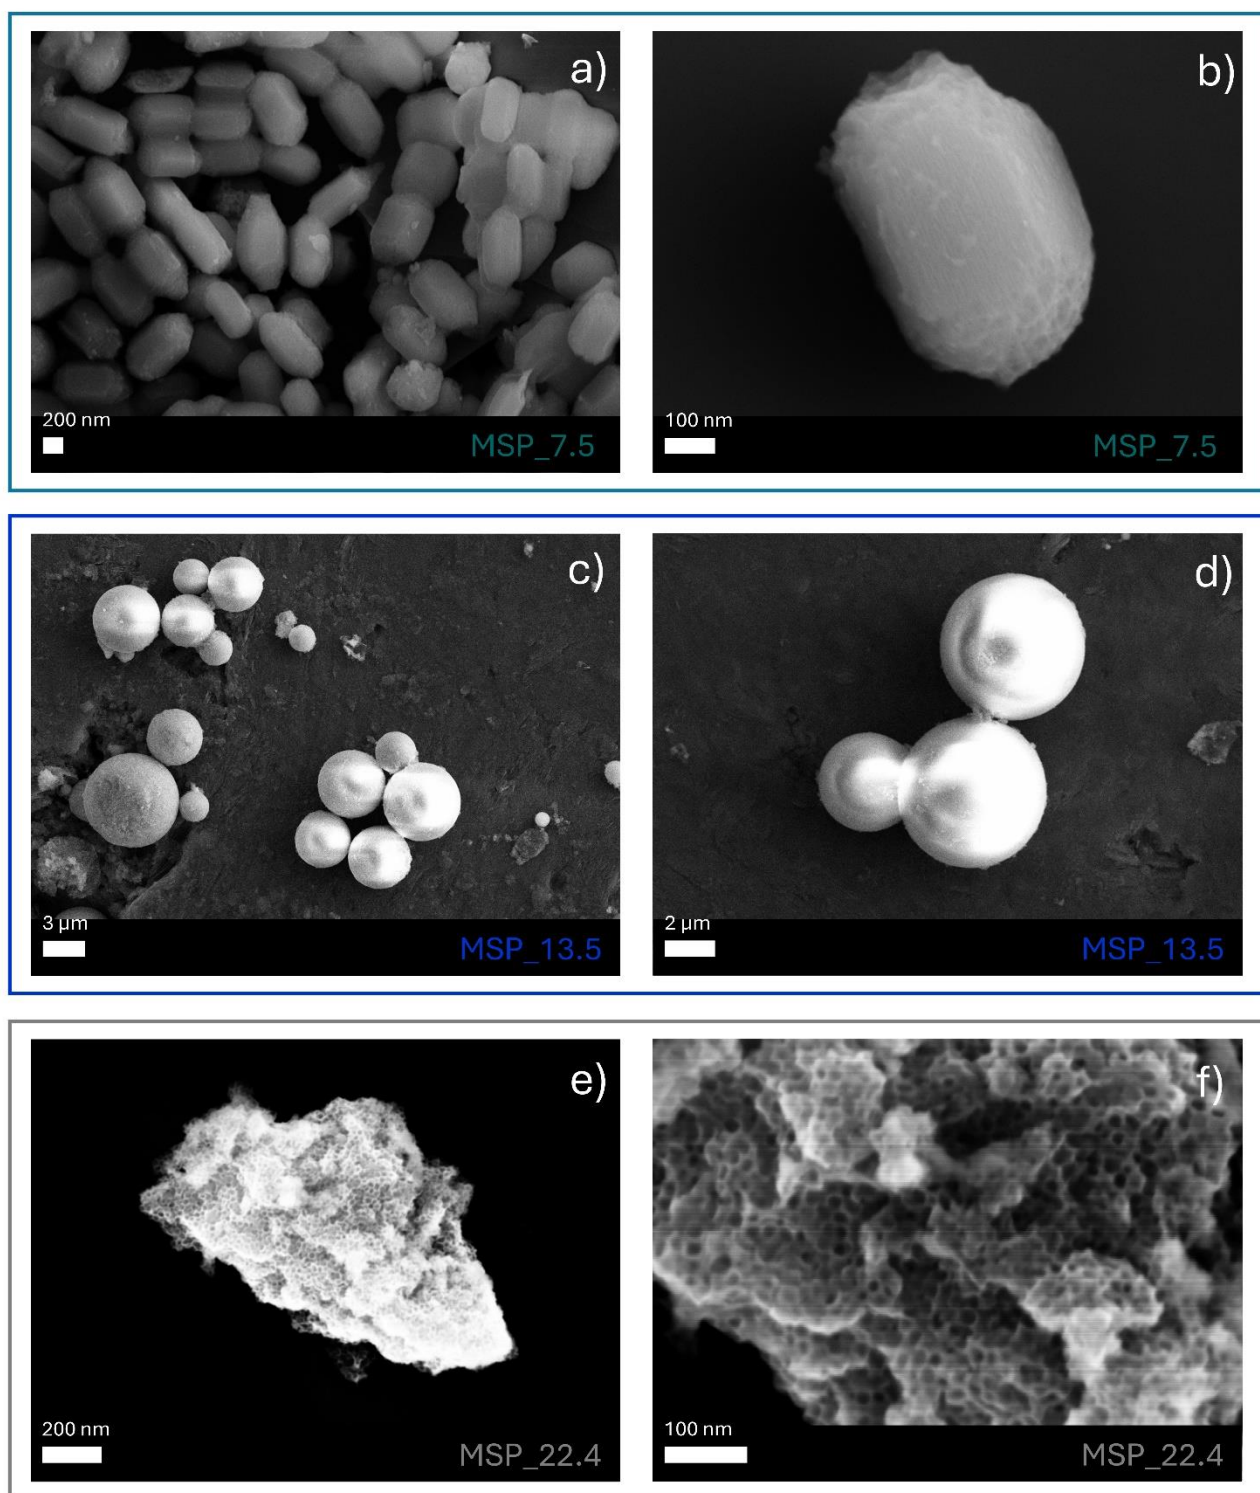

**Figure S1.** FE-SEM images of (a,b) SBA-15 with average pores of 7.5 nm, (c,d) MSPs obtained by using TMB/Pluronic P123 ratio of 0.3:1 and (e,f) TMB/Pluronic P123 ratio of 0.5:1.

**Table S1.** BET surface area, BJH pore volume and average pore diameter calculated from the N<sub>2</sub> physisorption measurements.

| Sample name | BET surface area<br>[m <sup>2</sup> /g] | BJH pore volume<br>[cm <sup>3</sup> /g] | Pore diameter<br>[nm] |
|-------------|-----------------------------------------|-----------------------------------------|-----------------------|
| MSP_3.1     | 1236                                    | 1.035                                   | 3.1                   |
| MSP_4.2     | 853                                     | 0.955                                   | 4.2                   |
| MSP_7.5     | 873                                     | 0.976                                   | 7.5                   |
| MSP_13.5    | 809                                     | 0.875                                   | 13.5                  |
| MSP_22.4    | 932                                     | 1.653                                   | 22.4                  |

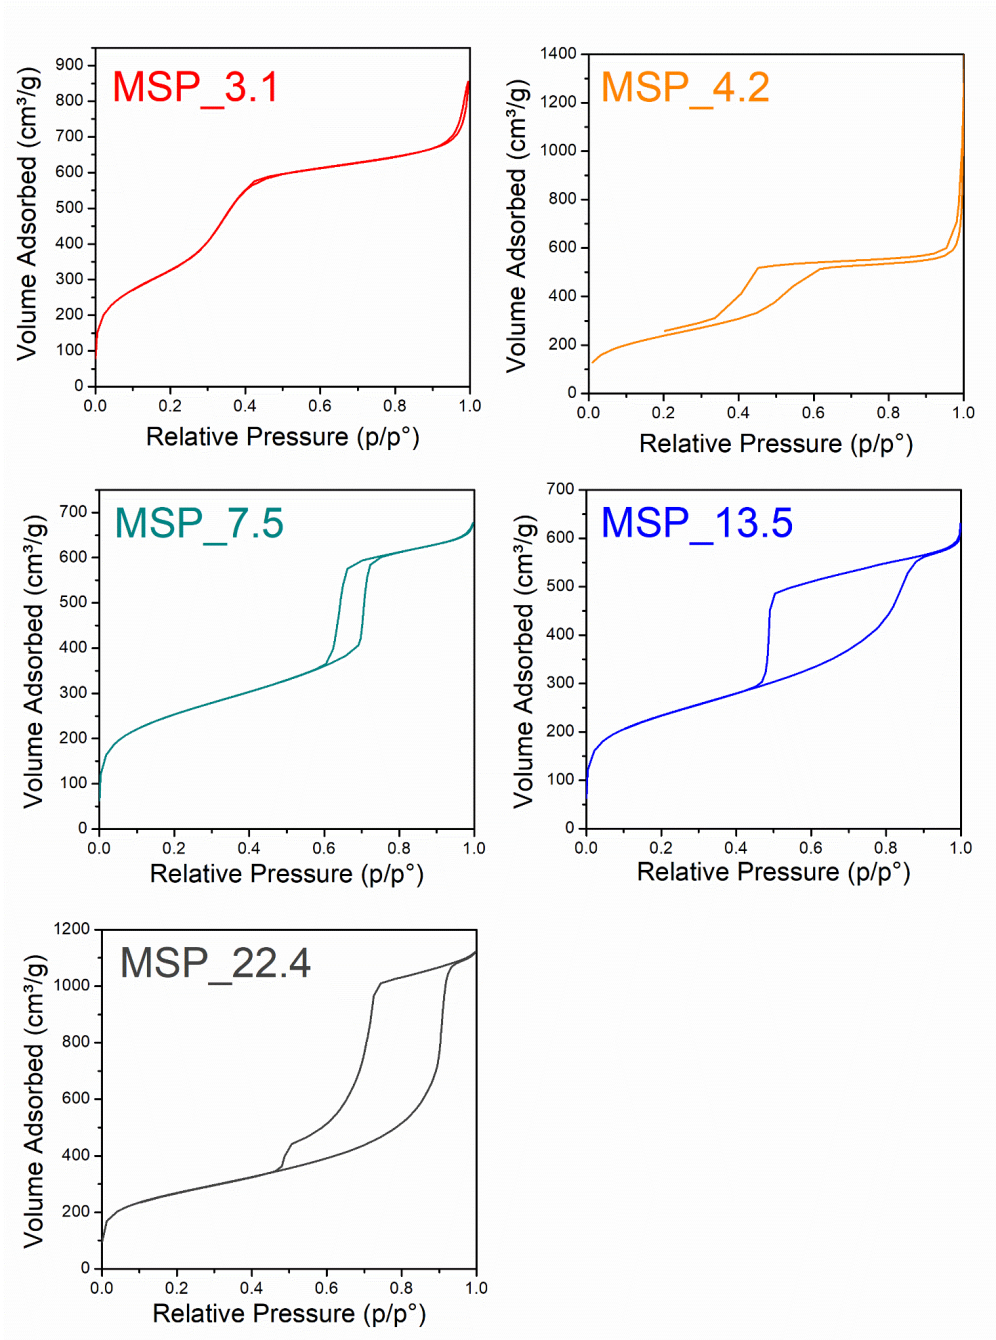

**Figure S2.** N<sub>2</sub> adsorption/desorption hysteresis of the MSPs.



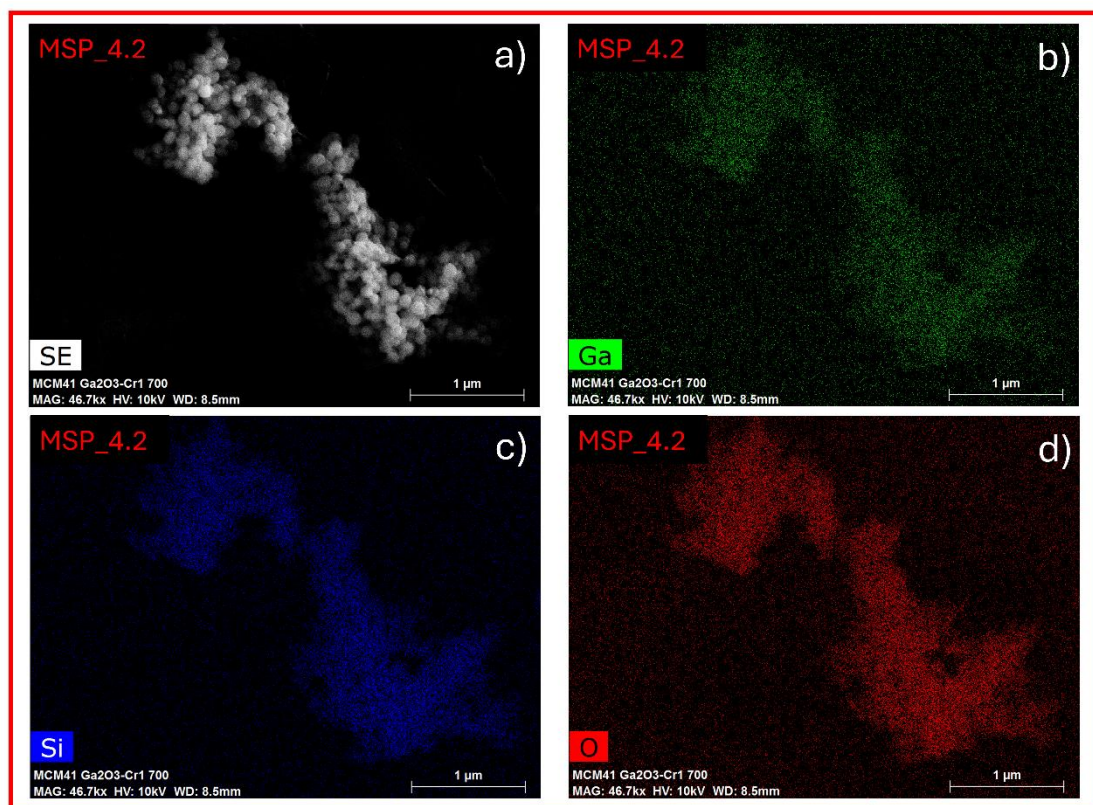

**Figure S3.** Representative (a) secondary electron-SEM image and corresponding EDX elemental map of (b) Ga, (c) Si and (d) O for  $\text{Ga}_2\text{O}_3:\text{Cr}^{3+}$ @MSP\_4.2 samples.

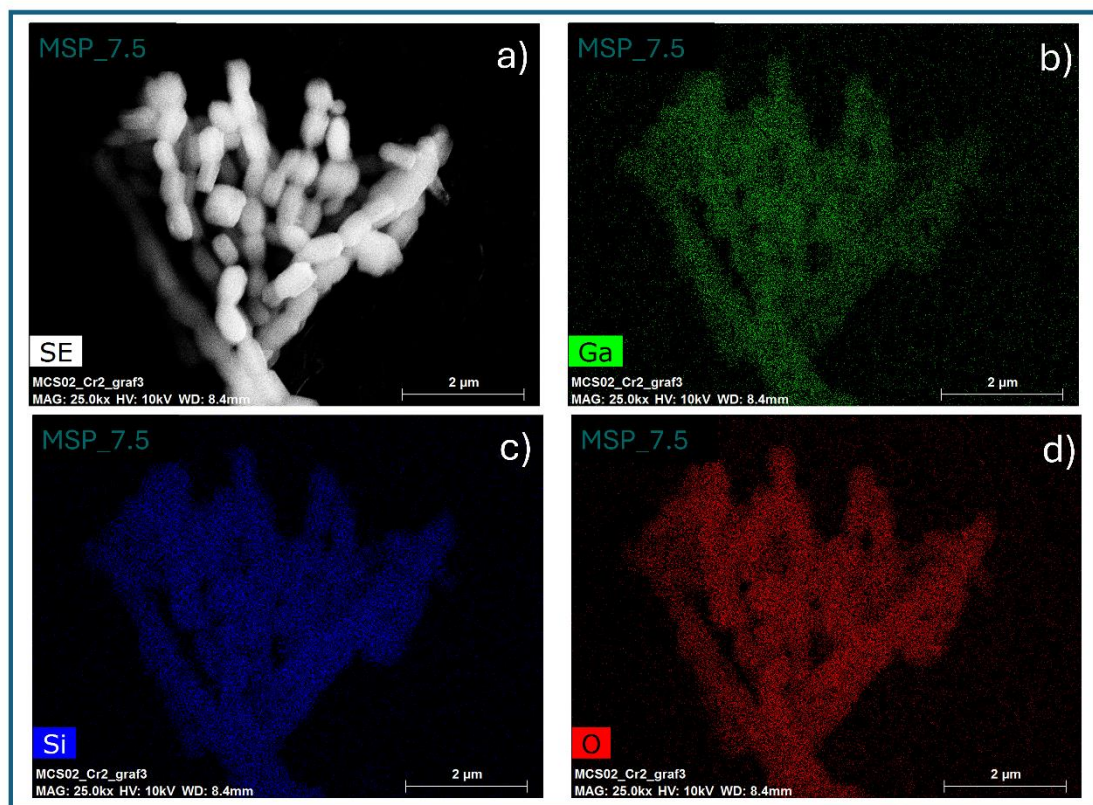

**Figure S4.** Representative (a) secondary electron-SEM image and corresponding EDX elemental map of (b) Ga, (c) Si and (d) O for  $\text{Ga}_2\text{O}_3:\text{Cr}^{3+}$ @MSP\_7.5 samples.

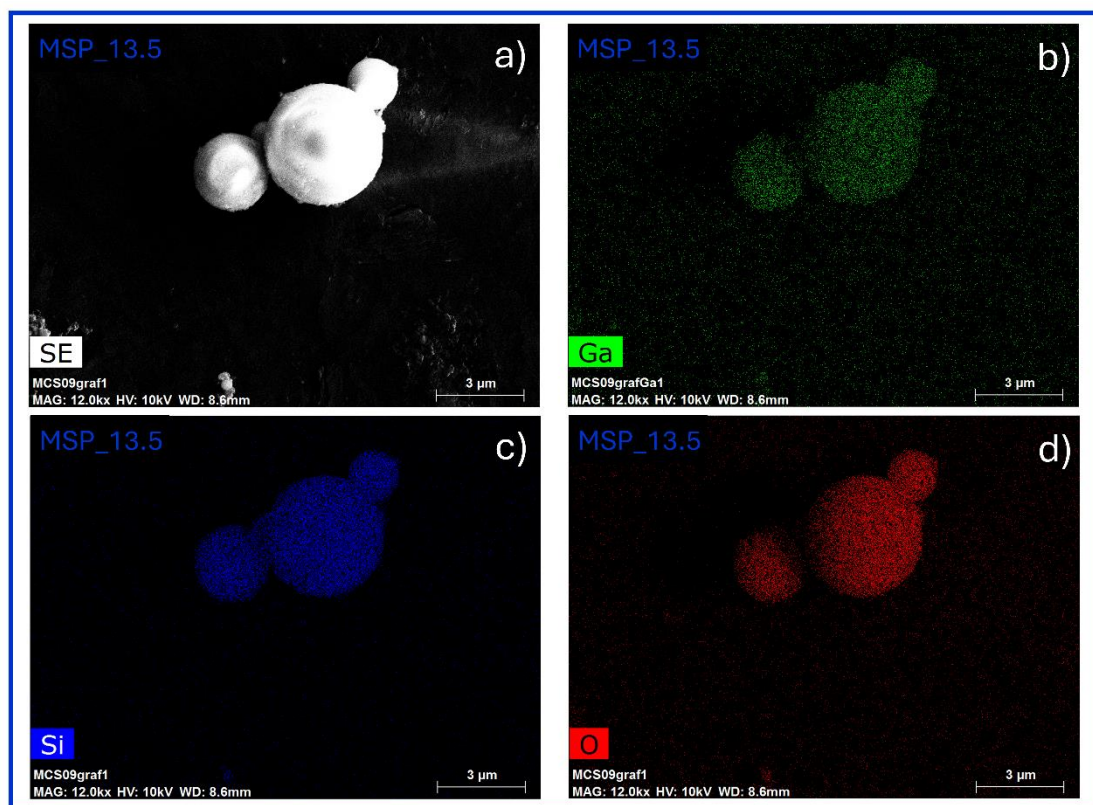

**Figure S5.** Representative (a) secondary electron-SEM image and corresponding EDX elemental map of (b) Ga, (c) Si and (d) O for  $\text{Ga}_2\text{O}_3:\text{Cr}^{3+}@\text{MSP}_13.5$  samples.



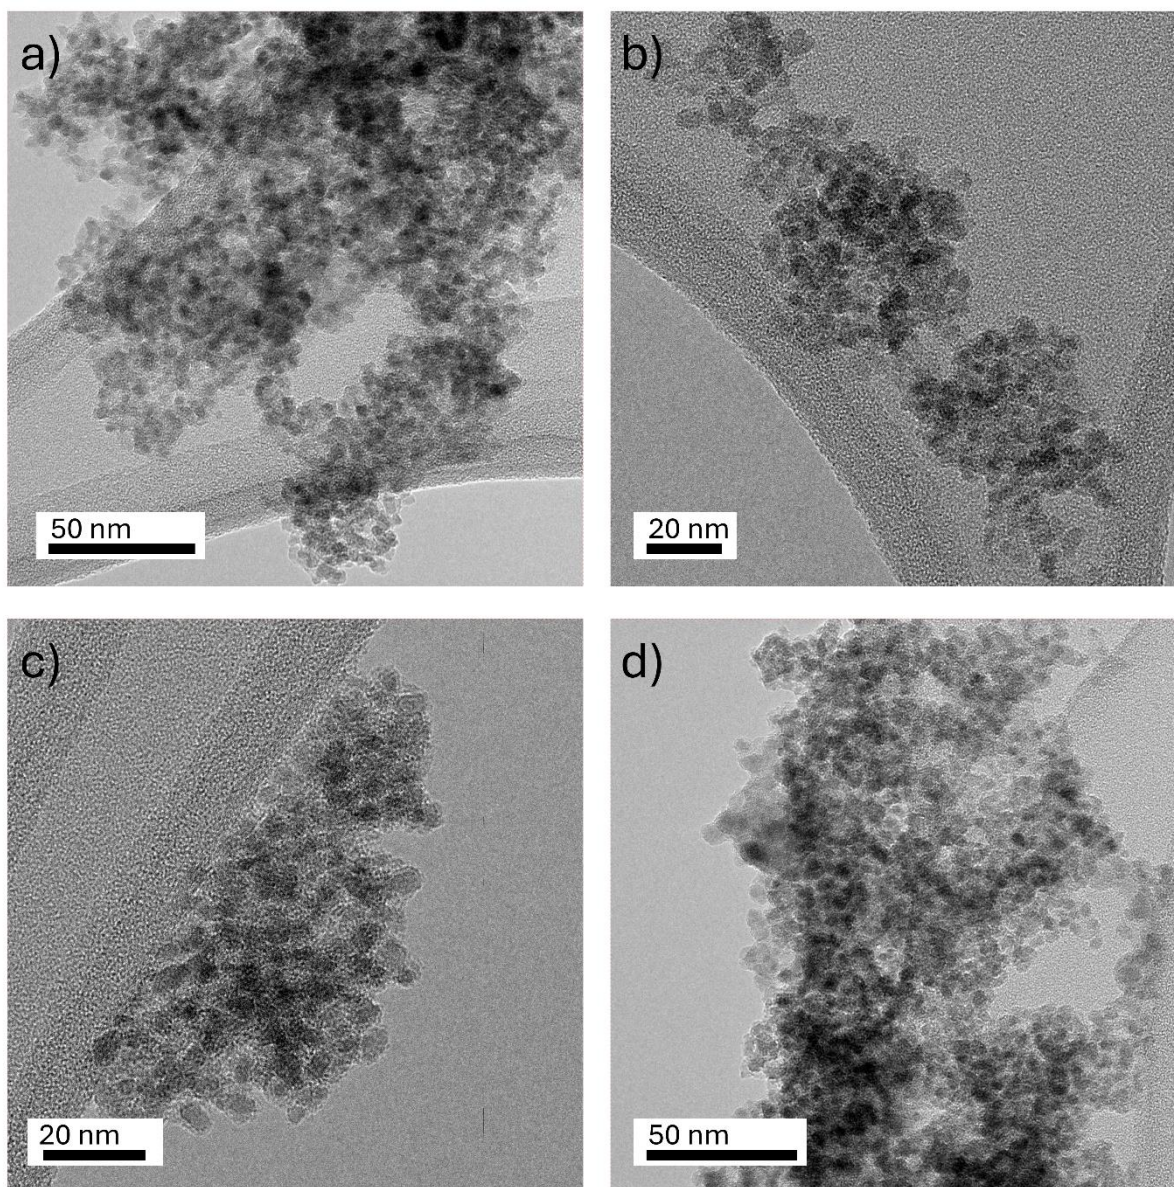

**Figure S6.** TEM images of the  $\gamma\text{-Ga}_2\text{O}_3\text{:Cr}^{3+}$  NCs etched from the MSP\_7.5.

**Table S2.** Measured and tabulated crystal plane distances and corresponding (hkl) crystal planes of the  $\gamma\text{-Ga}_2\text{O}_3$  phase (ICSD#152085) extrapolated from the FFT analysis of the HR-TEM images.

| <i>d</i> -spacing (Å) | <i>d</i> -spacing theory (Å) | (hkl) |
|-----------------------|------------------------------|-------|
| 2.486                 | 2.48385                      | (311) |
| 1.668                 | 1.68157                      | (422) |
| 2.371                 | 2.37811                      | (222) |



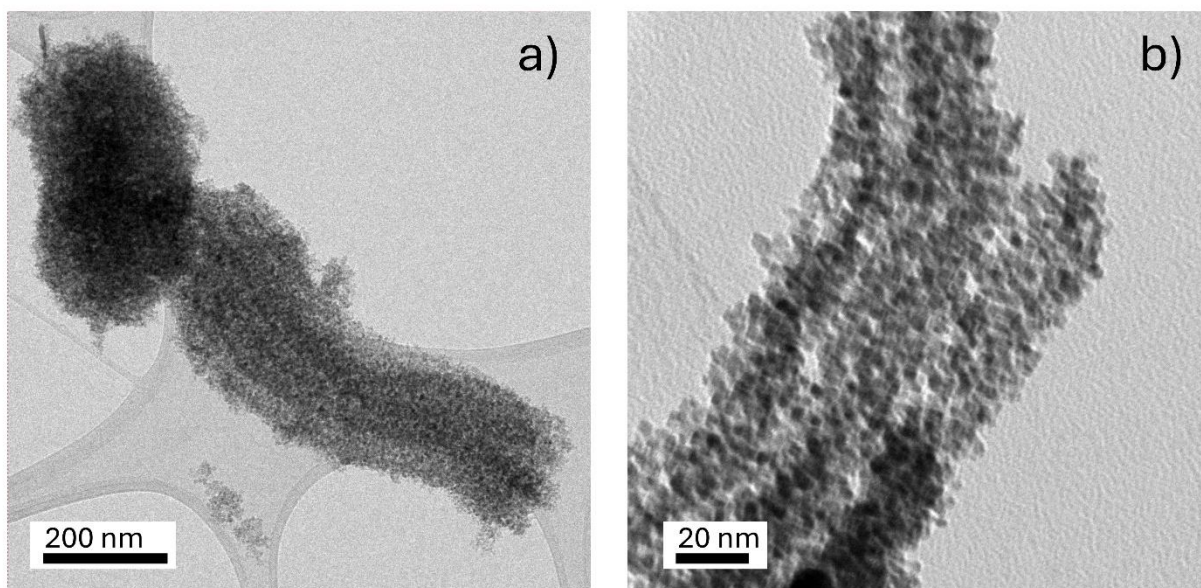

**Figure S7.** TEM images of the  $\gamma$ -Ga<sub>2</sub>O<sub>3</sub>:Cr<sup>3+</sup> nanocasting SBA-15 replica obtained by the etching process from the MSP\_7.5 without the use of ultrasonic bath.

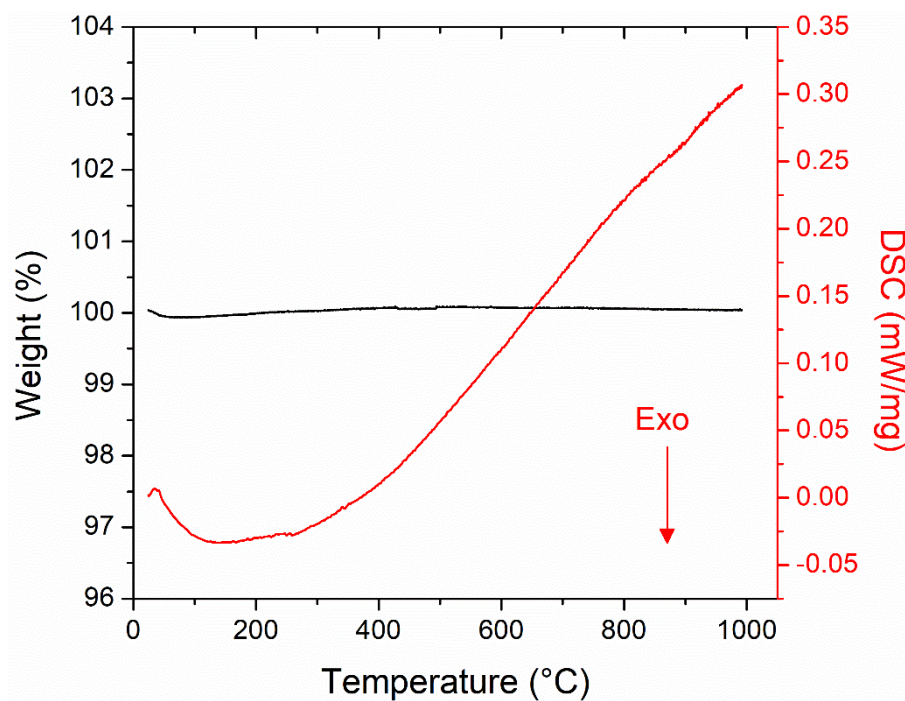

**Figure S8.** TG-DSC analysis of the sample.

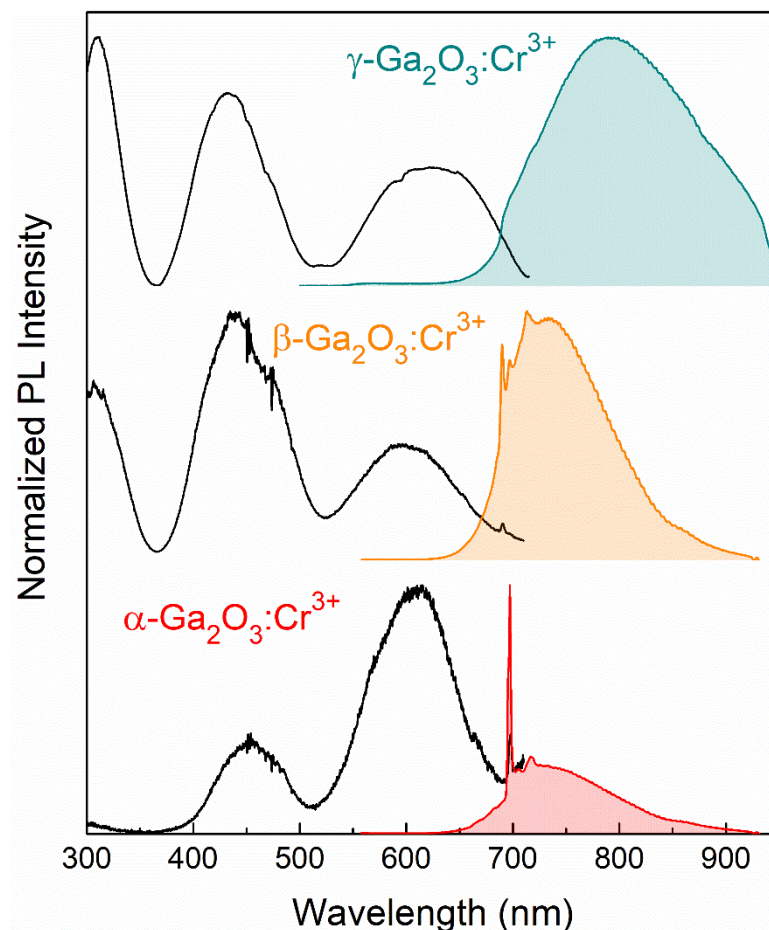

**Figure S9.** PL and PLE spectra of Cr<sup>3+</sup> in α-Ga<sub>2</sub>O<sub>3</sub> and β-Ga<sub>2</sub>O<sub>3</sub> and γ-Ga<sub>2</sub>O<sub>3</sub> polymorphs.
